# Supplementary material
Source: PubMed Central journal article supplement (PMC3370855)
Supplement: supp_194.12.3199_TableS1.pdf [file supp_194.12.3199_TableS1.pdf]

TABLE S1 Overview of the gene content in the detected genomic islands of *C. diphtheriae*

| ID    | Ref. strain      | Prominent function of island genes                                | Begin CDS  | End CDS    | Begin position | End position |
|-------|------------------|-------------------------------------------------------------------|------------|------------|----------------|--------------|
| GEI01 | <b>NCTC13129</b> | diphtheria toxin encoding corynephage                             | DIP0179    | DIP0222    | 152426         | 190661       |
| GEI02 | <b>NCTC13129</b> | adhesive pilus SpaDEF                                             | DIP0223    | DIP0247    | 190816         | 210235       |
| GEI03 | <b>NCTC13129</b> | iron transport system                                             | DIP0282    | DIP0290    | 249276         | 256671       |
| GEI04 | <b>NCTC13129</b> | secreted proteins, including polysaccharide degradation enzyme    | DIP0334    | DIP0359    | 305695         | 326445       |
| GEI05 | <b>NCTC13129</b> | metal transport system and secreted proteins                      | DIP0438    | DIP0445    | 400793         | 409559       |
| GEI06 | <b>NCTC13129</b> | lantibiotic biosynthesis proteins                                 | DIP0750    | DIP0766    | 726536         | 742674       |
| GEI07 | <b>NCTC13129</b> | phage-related proteins                                            | DIP0794    | DIP0823    | 776261         | 796859       |
| GEI08 | <b>NCTC13129</b> | secreted proteins, including extracellular matrix-binding protein | DIP1645    | DIP1664    | 1680222        | 1700446      |
| GEI09 | <b>NCTC13129</b> | phage-related proteins                                            | DIP1817    | DIP1843    | 1866720        | 1883310      |
| GEI10 | <b>NCTC13129</b> | adhesive pilus SpaABC                                             | DIP2010    | DIP2015    | 2059672        | 2070753      |
| GEI11 | <b>NCTC13129</b> | fimbrial-associated protein and surface-anchored protein          | DIP2064    | DIP2093    | 2114764        | 2144615      |
| GEI12 | <b>NCTC13129</b> | siderophore biosynthesis and transport proteins                   | DIP2143    | DIP2170    | 2210329        | 2244077      |
| GEI13 | <b>NCTC13129</b> | CRISPR locus                                                      | DIP2208    | DIP2234    | 2297805        | 2322967      |
| GEI14 | <b>NCTC13129</b> | CRISPR locus                                                      | DIP_0028   | DIP_0051   | 27025          | 43284        |
| GEI15 | <b>NCTC13129</b> | iron transport system                                             | DIP_0071   | DIP_0115   | 63353          | 94809        |
| GEI16 | <b>NCTC13129</b> | antibiotic resistance protein                                     | DIP_0267   | DIP_0275   | 230464         | 239860       |
| GEI17 | <b>NCTC13129</b> | transport system with unknown function                            | DIP_0320   | DIP_0326   | 285652         | 291817       |
| GEI18 | <b>NCTC13129</b> | two-component system and transport system with unknown function   | DIP_0448   | DIP_0466   | 418336         | 436609       |
| GEI19 | <b>NCTC13129</b> | siderophore biosynthesis and transport proteins                   | DIP_0582   | DIP_0607   | 550390         | 573656       |
| GEI20 | <b>NCTC13129</b> | transport system with unknown function                            | DIP_1891   | DIP_1901   | 1941600        | 1956347      |
| GEI21 | <b>NCTC13129</b> | secreted proteins                                                 | DIP_2021   | DIP_2049   | 2076036        | 2096446      |
| GEI22 | <b>NCTC13129</b> | transport system with unknown function                            | DIP_2123   | DIP_2135   | 2176625        | 2198998      |
| GEI23 | <b>NCTC13129</b> | two-component system and transport system with unknown function   | DIP_2302   | DIP_2345   | 2398584        | 2451928      |
| GEI24 | <b>C7B</b>       | phage-related proteins                                            | CDC7B_1067 | CDC7B_1150 | 1089037        | 1159359      |
| GEI25 | <b>C7B</b>       | lantibiotic biosynthesis proteins                                 | CDC7B_1930 | CDC7B_1952 | 2024186        | 2051307      |
| GEI26 | <b>C7B</b>       | siderophore biosynthesis and transport proteins                   | CDC7B_2014 | CDC7B_2065 | 2107819        | 2166562      |
| GEI27 | <b>C7B</b>       | surface-anchored protein                                          | CDC7B_2160 | CDC7B_2165 | 2279123        | 2284410      |
| GEI28 | <b>C7B</b>       | restriction modification system                                   | CDC7B_2179 | CDC7B_2206 | 2304445        | 2332330      |
| GEI29 | <b>PW8</b>       | CRISPR locus                                                      | CDPW8_91   | CDPW8_109  | 21058          | 39313        |
| GEI30 | <b>PW8</b>       | adhesive pilus SpaDEF                                             | CDPW8_293  | CDPW8_337  | 213939         | 252446       |

|       |                  |                                                             |               |               |         |         |
|-------|------------------|-------------------------------------------------------------|---------------|---------------|---------|---------|
| GEI31 | <b>PW8</b>       | transport system with unknown function                      | CDPW8_576     | CDPW8_592     | 498739  | 509951  |
| GEI32 | <b>PW8</b>       | cadmium resistance transporter                              | CDPW8_1087    | CDPW8_1095    | 1016410 | 1022192 |
| GEI33 | <b>PW8</b>       | restriction modification system                             | CDPW8_1739    | CDPW8_1758    | 1716010 | 1739950 |
| GEI34 | <b>PW8</b>       | iron transport system                                       | CDPW8_2284    | CDPW8_2316    | 2323322 | 2352900 |
| GEI35 | <b>PW8</b>       | phage related proteins                                      | CDPW8_2386    | CDPW8_2451    | 2426181 | 2492501 |
| GEI36 | <b>CDC-E8392</b> | iron transport system                                       | CDCE8392_1780 | CDCE8392_1803 | 1867205 | 1885631 |
| GEI37 | <b>CDC-E8392</b> | siderophore biosynthesis and transport proteins             | CDCE8392_1959 | CDCE8392_2005 | 2043540 | 2098643 |
| GEI38 | <b>31A</b>       | heavy metal resistance                                      | CD31A_0060    | CD31A_0122    | 62250   | 115198  |
| GEI39 | <b>31A</b>       | phage related proteins                                      | CD31A_0181    | CD31A_0221    | 172652  | 212984  |
| GEI40 | <b>31A</b>       | phage related proteins                                      | CD31A_1825    | CD31A_1849    | 1886509 | 1902588 |
| GEI41 | <b>31A</b>       | PTS system components                                       | CD31A_2235    | CD31A_2267    | 2343563 | 2369797 |
| GEI42 | <b>241</b>       | iron transport system                                       | CD241_0050    | CD241_0112    | 52109   | 98200   |
| GEI43 | <b>241</b>       | phage related proteins                                      | CD241_1056    | CD241_1076    | 1077551 | 1101484 |
| GEI44 | <b>VA01</b>      | phage related proteins                                      | CDVA01_0690   | CDVA01_0709   | 716595  | 737522  |
| GEI45 | <b>HC02</b>      | phage related proteins                                      | CDHC02_1627   | CDHC02_1680   | 1750716 | 1803508 |
| GEI46 | <b>HC02</b>      | exinuclease ABC subunit and restriction modification system | CDHC02_1907   | CDHC02_1948   | 2053624 | 2100249 |
| GEI47 | <b>HC03</b>      | adhesive pilus SpaDEF                                       | CDHC03_0157   | CDHC03_0183   | 147156  | 172869  |
| GEI48 | <b>HC03</b>      | aromatic compound degradation pathway                       | CDHC03_1952   | CDHC03_1993   | 2092490 | 2136335 |
| GEI49 | <b>HC03</b>      | adhesive pilus SpaGHI                                       | CDHC03_2104   | CDHC03_2124   | 2286643 | 2303806 |
| GEI50 | <b>HC03</b>      | phage related proteins                                      | CDHC03_2189   | CDHC03_2243   | 2381066 | 2441651 |
| GEI51 | <b>INCA 402</b>  | secreted protein                                            | CDB402_0096   | CDB402_0116   | 98619   | 117765  |
| GEI52 | <b>INCA 402</b>  | adhesive pilus SpaGHI                                       | CDB402_0196   | CDB402_0212   | 209290  | 228289  |
| GEI53 | <b>INCA 402</b>  | restriction modification system                             | CDB402_0644   | CDB402_0648   | 673508  | 682784  |
| GEI54 | <b>BH8</b>       | antibiotic resistance protein                               | CDBH8_0909    | CDBH8_0937    | 903839  | 933423  |
| GEI55 | <b>BH8</b>       | restriction modification system                             | CDBH8_0994    | CDBH8_1000    | 985642  | 995208  |
| GEI56 | <b>BH8</b>       | restriction modification system and iron transport system   | CDBH8_1865    | CDBH8_1886    | 1932568 | 1958462 |
| GEI57 | <b>BH8</b>       | transport system with unknown function                      | CDBH8_2097    | CDBH8_2124    | 2170434 | 2203375 |
